# Supplementary material
Source: HighWire-hosted journal article supplement (https://tobaccocontrol.bmj.com/content/tc-2024-058622)
Supplement: inline-supplementary-material-1 [file inline-supplementary-material-1.pdf]

## **GLOBAL LANDSCAPE OF NICOTINE AND TOBACCO PRODUCTS ADDITIVES POLICIES**

### **SUPPLEMENTAL FILE:**

Supplemental Table – Global nicotine and tobacco products additives and/or flavour regulation, as of July 01, 2024.

Supplemental Table – Global nicotine and tobacco products additives and/or flavour regulation, as of July 01, 2024.

| Country/ Region |                     | NATIONAL LEVEL<br>(Year of implementation)                                                                                                                                                                                                                 | STATE/PROVINCE/OR EQUIVALENT LEVEL<br>(Year of implementation)                                                                                                                                                                                                                                                                                                                                                                                                                                                                                                                                                                                                                                                                                                                                                                                                                                                                                                                                                                                                                                                                                                                                                                                                                                                                                                                                                                                |
|-----------------|---------------------|------------------------------------------------------------------------------------------------------------------------------------------------------------------------------------------------------------------------------------------------------------|-----------------------------------------------------------------------------------------------------------------------------------------------------------------------------------------------------------------------------------------------------------------------------------------------------------------------------------------------------------------------------------------------------------------------------------------------------------------------------------------------------------------------------------------------------------------------------------------------------------------------------------------------------------------------------------------------------------------------------------------------------------------------------------------------------------------------------------------------------------------------------------------------------------------------------------------------------------------------------------------------------------------------------------------------------------------------------------------------------------------------------------------------------------------------------------------------------------------------------------------------------------------------------------------------------------------------------------------------------------------------------------------------------------------------------------------------|
| 1.              | Albania             | (2019) Banned the placement in the market of tobacco products with characterizing flavour, including menthol <sup>1</sup>                                                                                                                                  | N/A                                                                                                                                                                                                                                                                                                                                                                                                                                                                                                                                                                                                                                                                                                                                                                                                                                                                                                                                                                                                                                                                                                                                                                                                                                                                                                                                                                                                                                           |
| 2.              | Antigua and Barbuda | (2018) Banned tobacco products having characterizing flavour, containing a flavouring in any component or any technical feature allowing modification of the smell or taste of the tobacco product, or its smoke intensity, including menthol <sup>2</sup> | N/A                                                                                                                                                                                                                                                                                                                                                                                                                                                                                                                                                                                                                                                                                                                                                                                                                                                                                                                                                                                                                                                                                                                                                                                                                                                                                                                                                                                                                                           |
| 3.              | Australia           | (2024) Banned the inclusion of prohibited tobacco product accessories (example: flavour capsules), including those that alter, or are capable of altering, the flavour or smell of a tobacco product. <sup>3</sup>                                         | (2017) Queensland — Ban the sales of fruit and confectionary flavoured tobacco products <sup>4</sup><br>(2018) Western Australia — Packages cannot be displayed by retailers if they contain (or have words, pictures or images that suggest they contain) fruit or confectionary flavoured cigarettes; fruit and confectionary flavoured cigarettes are prohibited <sup>5</sup><br>(2012) Tasmania — Sales of fruit and confectionary flavoured tobacco products and non-tobacco products (designed to resemble a tobacco product) are prohibited. <sup>6</sup><br>(2009) Victoria — The Secretary may recommend a ban in respect of a product if the product or its smoke possesses a distinctive fruity, sweet or confectionary-like character; or the product has packaging that appeals to children or young people. <sup>7</sup><br>Non-Tobacco Products: Resembles a tobacco product; or is of a nature or is advertised in a way that may encourage children or young people to smoke and the supply of the product should be prohibited, with regard to the objects of the Act<br>(2008) New South Wales — The Minister may declare a tobacco product prohibited if the product or its smoke has a distinctive fruity, sweet or confectionary-like character that might encourage a minor to smoke. <sup>8</sup><br>(2006) South Australia — The Minister may declare a tobacco product prohibited if the product or its smoke has a |

|    |                   |                                                                                                                                                                                                                                                                                                                                                                                                                |                                                                                                                                                                                                                                                                                                                                                                                                                                                                                                                                                                                                                                                                                                                                                                                                                                                                                                                                                                                                                                                                                                                 |
|----|-------------------|----------------------------------------------------------------------------------------------------------------------------------------------------------------------------------------------------------------------------------------------------------------------------------------------------------------------------------------------------------------------------------------------------------------|-----------------------------------------------------------------------------------------------------------------------------------------------------------------------------------------------------------------------------------------------------------------------------------------------------------------------------------------------------------------------------------------------------------------------------------------------------------------------------------------------------------------------------------------------------------------------------------------------------------------------------------------------------------------------------------------------------------------------------------------------------------------------------------------------------------------------------------------------------------------------------------------------------------------------------------------------------------------------------------------------------------------------------------------------------------------------------------------------------------------|
|    |                   |                                                                                                                                                                                                                                                                                                                                                                                                                | distinctive fruity, sweet or confectionary like character that might encourage a minor to smoke. <sup>9</sup>                                                                                                                                                                                                                                                                                                                                                                                                                                                                                                                                                                                                                                                                                                                                                                                                                                                                                                                                                                                                   |
| 4. | <b>Bermuda</b>    | (2015) Banned the sale of flavoured tobacco products, exempts menthol <sup>10</sup>                                                                                                                                                                                                                                                                                                                            | N/A                                                                                                                                                                                                                                                                                                                                                                                                                                                                                                                                                                                                                                                                                                                                                                                                                                                                                                                                                                                                                                                                                                             |
| 5. | <b>Brazil</b>     | (2012) Banned tobacco additives that alter the flavour and aroma of smoke in all tobacco and non-tobacco products (due to court injunctions, several of these products remain in the market). <sup>11,12</sup>                                                                                                                                                                                                 | N/A                                                                                                                                                                                                                                                                                                                                                                                                                                                                                                                                                                                                                                                                                                                                                                                                                                                                                                                                                                                                                                                                                                             |
| 6. | <b>Cape Verde</b> | (2022) Banned tobacco additives that alter the flavour and aroma of smoke in all tobacco and non-tobacco products. <sup>13</sup>                                                                                                                                                                                                                                                                               | N/A                                                                                                                                                                                                                                                                                                                                                                                                                                                                                                                                                                                                                                                                                                                                                                                                                                                                                                                                                                                                                                                                                                             |
| 7. | <b>Canada</b>     | <p>(2009) Banned additives<br/>(2017) Banned menthol<br/>(2018) Banned flavour illustrations on vaping products.</p> <p>Regulation applied to Cigarettes, Cigars, (&lt;6 g), little cigars, blunt wraps <sup>14</sup></p>                                                                                                                                                                                      | <p>(2010, updated in 2019/2020) — Banned the sale of flavoured tobacco products/ banned flavoured vapour products. <sup>15</sup></p> <p>(2015) Nova Scotia — Banned the sale of flavoured tobacco and vaping products. <sup>16</sup></p> <p>(2015) Alberta — Banned the sale of flavoured tobacco and vaping products. <sup>17</sup></p> <p>(2016) Ontario — Banned the sale of flavoured tobacco products. <sup>18</sup></p> <p>(2017) Newfoundland and Labrador — Banned the sale of flavoured tobacco products. <sup>19</sup></p> <p>(2020) Northwest Territories — Banned the sale of flavoured tobacco and vaping products. <sup>20</sup></p> <p>(2016/2023) Quebec — Banned the sale of flavoured tobacco products and vaping products (2023). <sup>21</sup></p> <p>(2016/2021) New Brunswick — Sale of all flavoured tobacco (2016) and e-cigarettes (2021) are prohibited. <sup>22</sup></p> <p>(2017) Prince Edward Island — Banned the sale of flavoured tobacco and vaping products. <sup>23</sup></p> <p>(2020) Yukon — Banned the sale of flavoured tobacco and vaping products. <sup>24</sup></p> |
| 8. | <b>China</b>      | <p>(2022) Banned all characterizing flavours (including menthol) other than tobacco in electronic cigarettes. E-cigarettes products that do not contain nicotine must not enter the market for sale.. <sup>25,26</sup></p> <p>(No date announced) Hong Kong's Health Bureau announced that will ban flavoured cigarettes, including menthol cigarettes and candy/fruit-flavoured cigarettes. <sup>27</sup></p> | N/A                                                                                                                                                                                                                                                                                                                                                                                                                                                                                                                                                                                                                                                                                                                                                                                                                                                                                                                                                                                                                                                                                                             |
| 9. | <b>Congo</b>      | (2022) Banned the manufacture, import, distribution, possession, sale or giveaway of flavour capsule cigarettes, cigarettes with characterizing flavours, and shisha. <sup>28</sup>                                                                                                                                                                                                                            | N/A                                                                                                                                                                                                                                                                                                                                                                                                                                                                                                                                                                                                                                                                                                                                                                                                                                                                                                                                                                                                                                                                                                             |

|    |                                                                                                                                                                                                                                                                                           |                                                                                                                                                                                                                                                                                                                                                                                                                                                                                                                                                                                                                                                                                                                                                                                                                                                                                                                                                                                                                                                                                                                                                                                                                                                                                                                                                                                                                                                                                                                                                                                                                                                                                                                                                                       |     |
|----|-------------------------------------------------------------------------------------------------------------------------------------------------------------------------------------------------------------------------------------------------------------------------------------------|-----------------------------------------------------------------------------------------------------------------------------------------------------------------------------------------------------------------------------------------------------------------------------------------------------------------------------------------------------------------------------------------------------------------------------------------------------------------------------------------------------------------------------------------------------------------------------------------------------------------------------------------------------------------------------------------------------------------------------------------------------------------------------------------------------------------------------------------------------------------------------------------------------------------------------------------------------------------------------------------------------------------------------------------------------------------------------------------------------------------------------------------------------------------------------------------------------------------------------------------------------------------------------------------------------------------------------------------------------------------------------------------------------------------------------------------------------------------------------------------------------------------------------------------------------------------------------------------------------------------------------------------------------------------------------------------------------------------------------------------------------------------------|-----|
| 10 | <b>Cooperation Council for the Arab States of the Gulf (GCC)</b><br>(Bahrain, Kuwait, Oman, Qatar, Saudi Arabia, United Arab, Emirates)                                                                                                                                                   | <p>(2014) prohibit the following additives: <i>Acidum agaricinicum</i>, <i>oleum betulae empyreumaticum</i>, bitter almond oil associated with or containing hydrocyanic acid, <i>oleum sassafras</i>, <i>oleum juniperi empyreumaticum</i>, <i>oleum camphorae</i>, camphor, coumarin, safrole, thujone. Aromas and flavours produced from: stipites dulcamarae, lignum camphorae, rhizoma polypodii, rhizoma filicis dulcis, herba pulegii, lignum quassiae, cortex quilaiae, herba tanacetii, herba rutae, lignum sassafras, folia sassafras, cortex sassafras, melilotus officinalis, semen toncae, liatris odorata, asperula odorata. Adopted a positive list of additives. <sup>29</sup></p> <p>(2022) Saudi Arabia – some e-cigarette flavours, like cocoa, vanilla, coffee, tea, spices, candy, chewing gum, cola, and alcohol were banned. Fruit flavours, menthol, or a mixture of these are allowed. <sup>30,31</sup></p>                                                                                                                                                                                                                                                                                                                                                                                                                                                                                                                                                                                                                                                                                                                                                                                                                                  | N/A |
| 11 | <b>Ethiopia</b>                                                                                                                                                                                                                                                                           | (2015) Banned flavours, including menthol. <sup>32</sup>                                                                                                                                                                                                                                                                                                                                                                                                                                                                                                                                                                                                                                                                                                                                                                                                                                                                                                                                                                                                                                                                                                                                                                                                                                                                                                                                                                                                                                                                                                                                                                                                                                                                                                              | N/A |
| 12 | <b>European Union [92]</b><br>(Austria, Belgium, Bulgaria, Croatia, Cyprus, Czech Republic, Denmark, Estonia, Finland, France, Germany, Greece, Hungary, Ireland, Italy, Latvia, Lithuania, Luxembourg, Malta, Netherlands, Poland, Portugal, Romania, Slovakia, Slovenia, Spain, Sweden) | <p>Banned flavour additives in cigarettes, rolling tobacco and capsules since 2014 European Tobacco Products Directive (EUTPD) (2014/40/EU). Menthol banned in 2020. Adopted by all EU members. <sup>33</sup></p> <p>(2022) EU TPD requires member states to ban characterizing flavours in Heated Tobacco Products. <sup>33</sup></p> <p>The following countries have, or had, regulations in addition to the EUTPD:</p> <p>Belgium - (2012) banned three ingredients (E418 gomme gellane, E133 “bleu brillant FCF”, medium chain triglycerides (MCT) needed to include the “menthol capsules” in cigarettes. Banned TRPM8 receptor agonists. <sup>34</sup></p> <p>France – (2009) established a maximum limit for the presence of: vanilla, and vanilline and ethylvanilline in cigarettes. banned the sweetener applied to the cuff of the cigarette (threshold of analytical detection). <sup>35</sup></p> <p>Finland – (2017) banned all e-liquids with characterizing flavours, and therefore the only permitted flavour is tobacco. <sup>36</sup></p> <p>Germany – (2012) Banned flavour capsules (1977, updated in 2016) was the first country to ban additives, in this case additives with <u>CMR (carcinogenic, mutagenic and reprotoxic) properties</u> <sup>37–39</sup></p> <p>Netherlands (2023) – banned flavours in electronic cigarettes. <sup>40</sup></p> <p>(2025) – Ban functional additives; sugars, additives with coloring properties for the emissions; Additives that facilitate inhalation or nicotine uptake, including TRPM8 receptor agonists, menthol (and derivatives) and synthetic coolants in e-cigs and vapes <sup>41</sup></p> <p>Lithuania — (2009, replaced in 2016 by EUTPD) —prohibition on CMR additives. <sup>42</sup></p> | N/A |
| 13 | <b>Iran (Islamic Republic of)</b>                                                                                                                                                                                                                                                         | (2015) “The use of pictures, flavour or taste of any tobacco products in the production of food and vice versa are banned”.                                                                                                                                                                                                                                                                                                                                                                                                                                                                                                                                                                                                                                                                                                                                                                                                                                                                                                                                                                                                                                                                                                                                                                                                                                                                                                                                                                                                                                                                                                                                                                                                                                           | N/A |

|    |                     |                                                                                                                                                                                                                                                                                                                                                                                                                                                                        |     |
|----|---------------------|------------------------------------------------------------------------------------------------------------------------------------------------------------------------------------------------------------------------------------------------------------------------------------------------------------------------------------------------------------------------------------------------------------------------------------------------------------------------|-----|
|    |                     | (2022) In March 2022 the 55th Session of The Deregulation and Improvement of Business Environment Board decided to remove the term “vice versa” from the NHQTC Directive on Definitions, Scope and Characteristics of Tobacco Products Advertising, which made the rule not applicable to tobacco products. <sup>43</sup>                                                                                                                                              |     |
| 14 | <b>Kiribati*</b>    | (2013) Prohibited misleading labelling – including any brand element or any other written terms, descriptor, symbol or sign that directly or indirectly creates the false impression that a particular tobacco product is less harmful than other tobacco products. <sup>44</sup>                                                                                                                                                                                      | N/A |
| 15 | <b>Mauritania</b>   | (2018) Prohibited the use ingredients that can improve the taste of tobacco products, ingredients that have colouring properties in tobacco products. Menthol is banned. <sup>45</sup>                                                                                                                                                                                                                                                                                 | N/A |
| 16 | <b>Mauritius</b>    | (2022) Banned the sale, offer for sale, import, manufacture, or distribution of tobacco products, including cigarettes that have a characterizing flavour. Menthol is banned. <sup>46</sup>                                                                                                                                                                                                                                                                            | N/A |
| 17 | <b>Moldova</b>      | (2015) Banned tobacco products with characteristic flavour, ingredients that have colouring properties and CMR additives, includes menthol. <sup>47</sup>                                                                                                                                                                                                                                                                                                              | N/A |
| 18 | <b>Montenegro</b>   | (2019) Prohibited production and marketing of tobacco products with characteristic aroma and aromatic, substances or some technical features that allow change of odour or taste of tobacco product or intensity of tobacco smoke and CMR additives. Menthol is banned. <sup>48</sup>                                                                                                                                                                                  | N/A |
| 19 | <b>Niger</b>        | (2017) Regulated specified contents of cigarettes, including banning sugars and sweeteners; mint and spearmint; spices and herbs; and other flavours not previously specified. Menthol is allowed. <sup>49</sup>                                                                                                                                                                                                                                                       | N/A |
| 20 | <b>Nigeria</b>      | (2018) Banned characterizing flavours in the manufacture of cigarettes. Menthol is banned. <sup>50</sup>                                                                                                                                                                                                                                                                                                                                                               | N/A |
| 21 | <b>Norway</b>       | (2017) Banned cigarettes and roll-your-own tobacco with a “characteristic flavouring”, which is defined as those with discernible odour or flavour other than tobacco, as a result of an additive or a combination of additives, such as fruit, spices, herbs, alcohol, candy, menthol or vanilla, and that is noticeable before or during consumption of the goods. However, this provision will go into effect at a date to be determined by the King. <sup>51</sup> | N/A |
| 22 | <b>Philippines</b>  | (2022) Prohibited flavours in e-liquids, except menthol and tobacco. Banned of flavour descriptors and images on vaporized nicotine or non-nicotine and novel tobacco products. <sup>52</sup>                                                                                                                                                                                                                                                                          | N/A |
| 23 | <b>Senegal</b>      | (2016) Banned tobacco products with characterizing flavours. Menthol is banned. <sup>53</sup>                                                                                                                                                                                                                                                                                                                                                                          | N/A |
| 24 | <b>Sierra Leone</b> | (2022) Banned the manufacture, import, distribution and offer for sale of tobacco or nicotine products with characterizing flavours and additives associate with increase the nicotine uptake. <sup>54</sup>                                                                                                                                                                                                                                                           | N/A |
| 25 | <b>Sri Lanka</b>    | (2016) Banned the manufacture, import, sales or offer for sale any smokeless tobacco product or mixture that contain tobacco; any flavoured, coloured, or sweetened cigarette that contains tobacco; any electronic cigarette that contains tobacco. Menthol is banned. <sup>55</sup>                                                                                                                                                                                  | N/A |

|    |                            |                                                                                                                                                                                                                                                                                                                                          |                                                                                                                                                                                                                                                                                                                                                                                                                                                                                                                                                                                                                                                                                                                                                                                                                                                                                                                                                                                                                                                                                               |
|----|----------------------------|------------------------------------------------------------------------------------------------------------------------------------------------------------------------------------------------------------------------------------------------------------------------------------------------------------------------------------------|-----------------------------------------------------------------------------------------------------------------------------------------------------------------------------------------------------------------------------------------------------------------------------------------------------------------------------------------------------------------------------------------------------------------------------------------------------------------------------------------------------------------------------------------------------------------------------------------------------------------------------------------------------------------------------------------------------------------------------------------------------------------------------------------------------------------------------------------------------------------------------------------------------------------------------------------------------------------------------------------------------------------------------------------------------------------------------------------------|
| 26 | Turkey                     | (2019) Banned sales of cigarettes and crushed rolling tobacco with characterizing flavour. Banned Tobacco products containing additives with colouring properties for emissions, that make inhalation or nicotine delivery easier for smoking tobacco and CMR properties in unburned form. Menthol is banned. <sup>56</sup>              | N/A                                                                                                                                                                                                                                                                                                                                                                                                                                                                                                                                                                                                                                                                                                                                                                                                                                                                                                                                                                                                                                                                                           |
| 27 | Ukraine                    | (2021) Banned tobacco products with a characteristic smell and/or taste, additives that have the ability to make emissions coloured, additives that have CMR properties in unburnt form, containing additives that facilitate nicotine uptake or the inhalation of smoke. Menthol is banned. <sup>57</sup>                               | N/A                                                                                                                                                                                                                                                                                                                                                                                                                                                                                                                                                                                                                                                                                                                                                                                                                                                                                                                                                                                                                                                                                           |
| 28 | Uganda                     | (2015) Banned tobacco products with characterizing flavours, that has any technical feature that allows the release or modification of the smell or taste of the tobacco product or the smoke intensity, that contains colouring properties for emissions <sup>58</sup>                                                                  | N/A                                                                                                                                                                                                                                                                                                                                                                                                                                                                                                                                                                                                                                                                                                                                                                                                                                                                                                                                                                                                                                                                                           |
| 29 | United Kingdom             | (2016) Banned cigarettes or hand rolling tobacco with a characterising flavour, other than menthol, which have colouring effects on emissions, additives that facilitate inhalation or nicotine uptake, additives that have CMR properties in unburnt form or when it is consumed. <sup>59</sup><br>(2020) Banned menthol. <sup>60</sup> | N/A                                                                                                                                                                                                                                                                                                                                                                                                                                                                                                                                                                                                                                                                                                                                                                                                                                                                                                                                                                                                                                                                                           |
| 30 | United States of America** | (2009) Banned additives or ingredients that impart characterizing flavour in the tobacco product or tobacco smoke in cigarettes and roll-your-own tobacco, exempts menthol.<br>(2022) Proposed rule to prohibit menthol in cigarettes and to prohibit all characterizing flavours (other than tobacco) in cigars <sup>61–64</sup> .      | (2022) California – Sale of most flavoured tobacco products prohibited — 143 municipalities/counties have additive regulations. Menthol is banned at state level.<br>Colorado — 7 municipalities/counties have additive regulations. Menthol is banned in 6 municipalities/counties.<br>Georgia —1 municipality/county has additive regulations. Menthol is banned in 1 municipality/county.<br>Illinois — 4 municipalities/counties have additive regulations. Menthol is banned in 1 municipality/county.<br>Maine — 8 municipalities/counties have additive regulations. Menthol is banned in 7 municipalities/counties.<br>(2020) Maryland – Flavoured e-cigs were banned – 1 municipality has additive regulations. Menthol is banned.<br>(2019) Massachusetts — Sale of all flavoured tobacco products is banned. Menthol is banned at state level. 168 municipalities/counties have additive regulations. Menthol is also banned in 22 municipalities/counties.<br>Minnesota — 30 municipalities/ counties have additive regulations. Menthol is banned in 22 municipalities/counties. |

|    |         |                                                                                                             |                                                                                                                                                                                          |
|----|---------|-------------------------------------------------------------------------------------------------------------|------------------------------------------------------------------------------------------------------------------------------------------------------------------------------------------|
|    |         |                                                                                                             | (2019) Montana – temporary ban of flavoured e-cigs in response to EVALI no longer in force. 1 municipality/county have additive regulations. Menthol is banned in 1 municipality/county. |
|    |         |                                                                                                             | (2018) New Jersey — Sale of all flavoured e-cigarettes prohibited in all locations. Menthol is banned at state level. 4 municipalities/counties have additive regulations                |
|    |         |                                                                                                             | (2019) New York State — Sale of all flavoured e-cigarettes is banned in all locations. Menthol is banned at state level — 2 municipalities/counties have additive regulations            |
|    |         |                                                                                                             | North Dakota — 2 municipalities/counties have additive regulations. Menthol is allowed.                                                                                                  |
|    |         |                                                                                                             | Ohio — 3 municipalities/counties have additive regulations. Menthol is banned in 2 municipalities/counties.                                                                              |
|    |         |                                                                                                             | Oregon — 2 municipalities/counties have additive regulations. Menthol is banned in 2 municipalities/counties.                                                                            |
|    |         |                                                                                                             | (2020) Rhode Island Sale of all flavoured (including menthol) e-cigarettes prohibited in all locations — 6 municipalities/counties have additive regulations.                            |
|    |         |                                                                                                             | (2021) Washington, DC — Sale of flavoured tobacco products (not applied to flavoured hookah to be consumed on site), including e-cigarettes prohibited. Menthol is banned.               |
| 31 | Uruguay | Banned ammonia in tobacco products in 2008. Menthol and other additives/flavours are allowed. <sup>65</sup> | (2020) – Utah - Sale of flavoured e-cigarettes is banned. Menthol is allowed.                                                                                                            |
|    |         |                                                                                                             | N/A                                                                                                                                                                                      |

Legend: CMR – Carcinogenic, mutagenic and reprotoxic properties

\* Countries that only regulated messages about additives or flavours on packaging. No regulations were found on the use of flavours or additives in tobacco products.  
\*\* For updated information on the regulatory status of USA cities see: Laura Bach, Campaign for Tobacco-Free Kids. States & Localities with Flavoured Tobacco Restrictions. 2024. Available from: <https://www.tobaccofreekids.org/assets/factsheets/0398.pdf>; American Nonsmokers’ Rights (ANR). Municipalities Prohibiting the Sale of Flavoured Tobacco Products. 2024. Available from: <https://no-smoke.org/wp-content/uploads/pdf/flavoured-tobacco-product-sales.pdf>; Public Health Law Center 2023. Available from: <https://www.publichealthlawcenter.org/sites/default/files/resources/US-sales-restrictions-flavoured-tobacco-products.pdf>

## References:

1. Albania. Law no. 56/2019 - on some amendments and additions to law no. 9636, dated 11.6.2006, “on the protection of health from tobacco products”, as amended [Internet]. [citado 21 de março de 2022]. Disponível em: [https://www.tobaccocontrollaws.org/files/live/Albania/Albania%20-%20Law%20No.%2056\\_2019.pdf](https://www.tobaccocontrollaws.org/files/live/Albania/Albania%20-%20Law%20No.%2056_2019.pdf)
2. Antigua and Barbuda. Tobacco Control Act 2018 No. 17 of 2018 [Internet]. 2018 p. 34. Disponível em: <http://laws.gov.ag/wp-content/uploads/2019/02/No.-17-of-2018-Tobacco-Control-Act-2018.pdf>
3. Australia, The Parliament of the, Commonwealth of Australia, House of Representatives. Public Health (Tobacco and Other Products) Bill 2023 [Internet]. out, 2023. Disponível em: [https://parlinfo.aph.gov.au/parlInfo/download/legislation/bills/r7083\\_aspassed/toc\\_pdf/23115b01.pdf;fileType=application%2Fpdf#search=%22legislation/bills/r7083\\_aspassed/0000%22](https://parlinfo.aph.gov.au/parlInfo/download/legislation/bills/r7083_aspassed/toc_pdf/23115b01.pdf;fileType=application%2Fpdf#search=%22legislation/bills/r7083_aspassed/0000%22)
4. Queensland government. Laws for retailing smoking products [Internet]. 2021. Disponível em: [https://www.health.qld.gov.au/\\_\\_data/assets/pdf\\_file/0018/700137/smoking-products-retailers.pdf](https://www.health.qld.gov.au/__data/assets/pdf_file/0018/700137/smoking-products-retailers.pdf)
5. Western Australian. Tobacco Products Control Act [Internet]. Western Australian Legislation. 2006 [citado 24 de janeiro de 2024]. Disponível em: [https://www.legislation.wa.gov.au/legislation/prod/filestore.nsf/FileURL/mrdoc\\_45891.pdf/\\$FILE/Tobacco%20Products%20Control%20Act%202006%20-%20%5B02-k0-00%5D.pdf?OpenElement](https://www.legislation.wa.gov.au/legislation/prod/filestore.nsf/FileURL/mrdoc_45891.pdf/$FILE/Tobacco%20Products%20Control%20Act%202006%20-%20%5B02-k0-00%5D.pdf?OpenElement)
6. Tasmania. Public Health Act 1997 An Act to protect and promote the health of communities in the State and reduce the incidence of preventable illness [Internet]. Disponível em: <https://www.legislation.tas.gov.au/view/whole/html/inforce/2014-07-01/act-1997-086>
7. Victoria Government. Authorised Version No. 094. Tobacco Act 1987. No. 81 of 1987 [Internet]. Disponível em: <https://content.legislation.vic.gov.au/sites/default/files/2020-05/87-81aa094%20authorised.pdf>
8. New South Wales Health. Tobacco and e-cigarette retailing laws - Tobacco and smoking [Internet]. 2021 [citado 17 de fevereiro de 2022]. Disponível em: <https://www.health.nsw.gov.au/tobacco/Pages/tobacco-retailing-laws.aspx>
9. Government of South Australia, Health SA. Tobacco related legislation [Internet]. [citado 17 de fevereiro de 2022]. Disponível em: <https://www.sahealth.sa.gov.au/wps/wcm/connect/Public+Content/SA+Health+Internet/About+us/Legislation/Tobacco+related+legislation/Tobacco+related+legislation>



10. Campaign for Tobacco Free Kids. Legislation by Country/ Jurisdiction - Bermuda [Internet]. Tobacco Control Laws. [citado 13 de julho de 2024]. Disponível em: <https://www.tobaccocontrolaws.org/legislation/bermuda/cigarette-contents>
11. BRASIL, Agência Nacional de Vigilância Sanitária. Resolução de Diretoria Colegiada - RDC nº 14 de 15 março de 2012. Dispõe sobre os limites máximos de alcatrão, nicotina e monóxido de carbono nos cigarros e a restrição do uso de aditivos nos produtos fumígenos derivados do tabaco, e dá outras providências. [Internet]. RDC 14/2012 2012. Disponível em: [http://portal.anvisa.gov.br/documents/10181/2978962/RDC\\_14\\_2012\\_.pdf/baeb28a7-90fc-49f3-9bf8-761de80af0b7](http://portal.anvisa.gov.br/documents/10181/2978962/RDC_14_2012_.pdf/baeb28a7-90fc-49f3-9bf8-761de80af0b7)
12. Oliveira da Silva AL, Bialous SA, Albertassi PGD, Arquete DA dos R, Fernandes AMMS, Moreira JC. The taste of smoke: tobacco industry strategies to prevent the prohibition of additives in tobacco products in Brazil. *Tob Control*. dezembro de 2019;28(e2):e92–101.
13. República de Cabo Verde. Lei nº 8/X/2022 - Assembléia Nacional de Cabo Verde [Internet]. [citado 9 de fevereiro de 2024]. Disponível em: <https://kiosk.incv.cv/1.1.47.4230/>
14. Canada. Tobacco and Vaping Products Act (S.C. 1997, c. 13) [Internet]. Disponível em: <http://laws-lois.justice.gc.ca/eng/acts/T-11.5/>
15. Saskatchewan. The Tobacco and Vapour Products Control Act, as amended by Statutes of Saskatchewan, 2002, c.C-11.1 and R-8.2; 2003, c.15; 2004, c.51; 2009, c.5; 2010, c.34; 2014, C-7.31; 2015, c.17; 2017, c.P-30.3; and 2019, c.32. [Internet]. 2002. Disponível em: <https://publications.saskatchewan.ca/#/products/902>
16. Nova Scotia. Tobacco Access Act. CHAPTER 14 OF THE ACTS OF 1993 2020 p. 9.
17. Province of Alberta. Tobacco, Smoking and Vaping Reduction Act. This Act establishes a number of measures to protect Albertans from the harms of tobacco, second-hand smoke, and vaping (particularly among youth). [Internet]. Chapter/Regulation: T-3.8 2005 2005. Disponível em: <https://open.alberta.ca/publications/t03p8>
18. Ontario. Smoke-Free Ontario Act, 2017, S.O. 2017, c. 26, Sched. 3 [Internet]. [citado 24 de janeiro de 2024]. Disponível em: <https://www.ontario.ca/laws/view>
19. Newfoundland and Labrador. Tobacco and vapour products control act. Amended: 1995 c25; 1996 cR-10.1 s73; 1996 cT-0.01 s20; 1999 c8; 2000 c24; 2009 c15; 2012 cP-12.2 s67; 2014 cC-11.01 s40 (not in force - not included here) 2016 c32 ss5 to 17; 2018 cC-4.1 s110 [Internet]. 1993. Disponível em: [https://assembly.nl.ca/legislation/sr/statutes/t04-1.htm#3\\_4](https://assembly.nl.ca/legislation/sr/statutes/t04-1.htm#3_4)
20. Government of Northwest Territories. Tobacco and Vapour Products Control Act [Internet]. 2020 p. 32. Disponível em: <https://www.justice.gov.nt.ca/en/files/legislation/tobacco-and-vapour-products/tobacco-and-vapour-products.a.pdf>

21. Quebec. l-6.2 - Tobacco Control Act [Internet]. 2023 [citado 24 de janeiro de 2024]. Disponível em: <https://www.legisquebec.gouv.qc.ca/en/document/cs/l-6.2>
22. New Brunswick. T-6.1 - Tobacco and Electronic Cigarette Sales Act [Internet]. 2023 [citado 24 de janeiro de 2024]. Disponível em: [https://laws.gnb.ca/en/document/cs/T-6.1?\\_gl=1\\*1w2xvii\\*\\_ga\\*MTMyMDEyMDQyOC4xNzA2MTIxODg4\\*\\_ga\\_F531P4D0XX\\*MTcwNjEyMTg4OC4xLjAuMTcwNjEyMTkzNy4wLjAuMA..](https://laws.gnb.ca/en/document/cs/T-6.1?_gl=1*1w2xvii*_ga*MTMyMDEyMDQyOC4xNzA2MTIxODg4*_ga_F531P4D0XX*MTcwNjEyMTg4OC4xLjAuMTcwNjEyMTkzNy4wLjAuMA..)
23. Prince Edward Island. Tobacco and electronic smoking device sales and access act [Internet]. 2020. Disponível em: [https://www.princeedwardisland.ca/sites/default/files/legislation/t-03-1-tobacco\\_and\\_electronic\\_smoking\\_device\\_sales\\_and\\_access\\_act.pdf](https://www.princeedwardisland.ca/sites/default/files/legislation/t-03-1-tobacco_and_electronic_smoking_device_sales_and_access_act.pdf)
24. Yukon. Tobacco and Vaping Products Control and Regulation Act - SY 2019, c.14 [Internet]. 2019. Disponível em: <https://laws.yukon.ca/cms/images/LEGISLATION/PRINCIPAL/2019/2019-0014/2019-0014.pdf>
25. Campaign for Tobacco Free Kids. Legislation by Country/ Jurisdiction - China [Internet]. Tobacco Control Laws. [citado 11 de setembro de 2024]. Disponível em: <https://www.tobaccocontrolaws.org/legislation/country/china/ec-policies>
26. Chowdhury A, Ettinger DJ, Gu E. China Publishes Final GB Standard on E-Cigarettes: The Basis for Product Compliance [Internet]. The National Law Review. 2022 [citado 7 de julho de 2022]. Disponível em: <https://www.natlawreview.com/article/china-publishes-final-gb-standard-e-cigarettes-basis-product-compliance>
27. Health Bureau HK. Government puts forward more targeted tobacco control measures to bring down tobacco hazards [Internet]. 2024 [citado 13 de julho de 2024]. Disponível em: <https://www.info.gov.hk/gia/general/202406/06/P2024060600570.htm>
28. Campaign for Tobacco Free Kids. Legislation by Country/ Jurisdiction - Congo [Internet]. Tobacco Control Laws. [citado 13 de julho de 2024]. Disponível em: <https://www.tobaccocontrolaws.org/legislation/congo/cigarette-contents>
29. Gulf Cooperation Council. GCC Standardization Organization (GSO) 2390 - 2014 [Internet]. 2014. Disponível em: [https://www.tobaccocontrolaws.org/files/live/Oman/Oman%20-%20GSO%202390\\_2014.pdf](https://www.tobaccocontrolaws.org/files/live/Oman/Oman%20-%20GSO%202390_2014.pdf)
30. Campaign for Tobacco Free Kids. Legislation by Country/ Jurisdiction - Saudi Arabia [Internet]. Tobacco Control Laws. [citado 24 de janeiro de 2024]. Disponível em: <https://www.tobaccocontrolaws.org/legislation/saudi-arabia>
31. Zhu E. Fruit and Menthol Survived Saudi Flavor Ban [Internet]. @2Firsts. 2022 [citado 24 de janeiro de 2024]. Disponível em: <https://www.2firsts.com/news/fruit-and-menthol-survived-saudi-flavor-ban>

32. Campaign for Tobacco Free Kids. Legislation by country/jurisdiction - Ethiopia [Internet]. Tobacco Control Laws. [citado 24 de janeiro de 2024]. Disponível em: <https://www.tobaccocontrolaws.org/legislation/ethiopia>
33. European Parliament. Directive 2014/40/EU of the European Parliament and of the Council of 3 April 2014 on the approximation of the laws, regulations and administrative provisions of the Member States concerning the manufacture, presentation and sale of tobacco and related products and repealing Directive 2001/37/EC [Internet]. Seç. Official Journal of the European Union 2014. Disponível em: <https://eur-lex.europa.eu/legal-content/EN/TXT/?uri=CELEX:32014L0040>
34. Campaign for Tobacco Free Kids. Legislation by Country/ Jurisdiction - Belgium [Internet]. Tobacco Control Laws. [citado 24 de janeiro de 2024]. Disponível em: <https://www.tobaccocontrolaws.org/legislation/belgium/laws>
35. Campaign for Tobacco Free Kids. Legislation by Country/ Jurisdiction - France [Internet]. Tobacco Control Laws. [citado 24 de janeiro de 2024]. Disponível em: <https://www.tobaccocontrolaws.org/legislation/france/laws>
36. Campaign for Tobacco Free Kids. Legislation by Country/ Jurisdiction - Finland [Internet]. Tobacco Control Laws. [citado 24 de janeiro de 2024]. Disponível em: <https://www.tobaccocontrolaws.org/legislation/finland/laws>
37. Germany. Tobacco Ordinance of December 20, 1977 (Bundesgesetzblatt, BGBl. [Federal Law Gazette] I p. 2831), which was last amended by Article 1 of the Ordinance of December 22, 2014 (BGBl. I p. 2398) [Internet]. Disponível em: <https://www.tobaccocontrolaws.org/files/live/Germany/Germany%20-%20Tobacco%20Decree%20.pdf>
38. Germany. TabakerzV - Verordnung über Tabakerzeugnisse und verwandte Erzeugnisse (Ordinance on Tobacco Products and Related Products (Tobacco Products Ordinance - TabakerzV) [Internet]. 2016. Disponível em: <https://www.gesetze-im-internet.de/tabakerzv/BJNR098010016.html>
39. Campaign for Tobacco Free Kids. Legislation by Country/ Jurisdiction - Germany [Internet]. Tobacco Control Laws. [citado 24 de janeiro de 2024]. Disponível em: <https://www.tobaccocontrolaws.org/legislation/germany/laws>
40. Welzijn en Sport Ministerie van Volksgezondheid. Besluit van 21 november 2022, houdende de wijziging van het Tabaks- en rookwarenbesluit in verband met de regulering van smaken voor e-sigaretten [Internet]. Staatsblad van het Koninkrijk der Nederlanden. Ministerie van Justitie en Veiligheid; 2022 [citado 24 de janeiro de 2024]. Disponível em: <https://zoek.officielebekendmakingen.nl/stb-2022-463.html>
41. Welzijn en Sport Ministerie van Volksgezondheid. Regeling van de Staatssecretaris van Volksgezondheid, Welzijn en Sport van 6 maart 2024, kenmerk 3770816-1061446-WJZ, houdende wijziging van de Tabaks- en rookwarenregeling in verband met vaststelling van een lijst met voor tabaksproducten en elektronische dampwaar verboden additieven [Internet]. Ministerie van Binnenlandse Zaken en

- Koninkrijksrelaties; mar 14, 2024. Disponível em:  
<https://zoek.officielebekendmakingen.nl/stcrt-2024-7582.html>
42. Campaign for Tobacco Free Kids. Legislation by country/jurisdiction - Lithuania [Internet]. Tobacco Control Laws. [citado 24 de janeiro de 2024]. Disponível em:  
<https://www.tobaccocontrolaws.org/legislation/lithuania/laws>
  43. Iranian Students' News Agency. Iran: Paradise of Tobacco Industries/ Cancellation of the ban on the production of aromatic tobacco - ایران؛ بهشت صنایع دخانی / لغو - خبرگزاری ایسنا | صفحه اصلی | ISNA News Agency; 2022 [citado 22 de setembro de 2023]. Disponível em:  
[isna.ir/xdMsjh](https://isna.ir/xdMsjh)
  44. Campaign for Tobacco Free Kids. Legislation by Country/ Jurisdiction Kiribati [Internet]. Tobacco Control Laws. [citado 21 de março de 2022]. Disponível em:  
<https://www.tobaccocontrolaws.org/files/live/Kiribati/Kiribati%20-%20TC%20Act%202013.pdf>
  45. Campaign for Tobacco Free Kids. Legislation by country/jurisdiction - Mauritania [Internet]. Tobacco Control Laws. [citado 24 de janeiro de 2024]. Disponível em:  
<https://www.tobaccocontrolaws.org/legislation/mauritania/laws>
  46. Campaign for Tobacco Free Kids. Mauritius [Internet]. Tobacco Control Laws. [citado 13 de julho de 2024]. Disponível em:  
<https://www.tobaccocontrolaws.org/legislation/mauritius/cigarette-contents>
  47. Campaign for Tobacco Free Kids. Legislation by country/jurisdiction - Moldova [Internet]. Tobacco Control Laws. [citado 24 de janeiro de 2024]. Disponível em:  
<https://www.tobaccocontrolaws.org/legislation/moldova/laws>
  48. Montenegro Ministry of Health. Zakon o ograničavanju upotrebe duvanskih proizvoda (46/2019 i 48/2019) [Internet]. 2019. Disponível em:  
<https://www.paragraf.me/propisi-crnegore/zakon-o-ogranicavanju-upotrebe-duvanskih-proizvoda.html>
  49. Campaign for Tobacco Free Kids. Legislation by Country/ Jurisdiction -Niger [Internet]. Tobacco Control Laws. [citado 24 de janeiro de 2024]. Disponível em:  
<https://www.tobaccocontrolaws.org/legislation/niger/laws>
  50. Campaign for Tobacco Free Kids. Legislation by Country/ Jurisdiction - Nigeria [Internet]. Tobacco Control Laws. [citado 24 de janeiro de 2024]. Disponível em:  
<https://www.tobaccocontrolaws.org/legislation/nigeria/laws>
  51. Campaign for Tobacco Free Kids. Legislation by country/jurisdiction - Norway [Internet]. [citado 21 de março de 2022]. Disponível em:  
<https://www.tobaccocontrolaws.org/legislation/norway/laws>
  52. The Food and Drug Administration (FDA) – Philippines. FDA Advisory No.2022-1069 - ban on the distribution, importation, manufacturing, sale, offer for sale and online retail of flavored liquid refill solutions other than tobacco and menthol flavor for vapor products starting 25 may 2022 [Internet]. 2022 [citado 13 de julho de 2024]. Disponível em: <https://www.fda.gov.ph/fda-advisory-no-2022-1069-ban->

on-the-distribution-importation-manufacturing-sale-offer-for-sale-and-online-retail-of-flavored-liquid-refill-solutions-other-than-tobacco-and-menthol-flavor-for-v/

53. Campaign for Tobacco Free Kids. Legislation by Country/ Jurisdiction - Senegal [Internet]. Tobacco Control Laws. [citado 24 de janeiro de 2024]. Disponível em: <https://www.tobaccocontrolaws.org/legislation/senegal/laws>
54. Sierra Leone [Internet]. Tobacco Control Laws. [citado 13 de julho de 2024]. Disponível em: <https://www.tobaccocontrolaws.org/legislation/sierra-leone/cigarette-contents>
55. Campaign for Tobacco Free Kids. Legislation by Country/ Jurisdiction - Sri Lanka [Internet]. Tobacco Control Laws. [citado 24 de janeiro de 2024]. Disponível em: <https://www.tobaccocontrolaws.org/legislation/sri-lanka/laws>
56. Campaign for Tobacco Free Kids. Legislation by Country/ Jurisdiction - Turkey [Internet]. Tobacco Control Laws. [citado 24 de janeiro de 2024]. Disponível em: <https://www.tobaccocontrolaws.org/legislation/turkey/laws>
57. Campaign for Tobacco Free Kids. Ukraine [Internet]. Tobacco Control Laws. [citado 13 de julho de 2024]. Disponível em: <https://www.tobaccocontrolaws.org/legislation/ukraine/cigarette-contents>
58. Campaign for Tobacco Free Kids. Legislation by Country/ Jurisdiction - Uganda [Internet]. Tobacco Control Laws. [citado 24 de janeiro de 2024]. Disponível em: <https://www.tobaccocontrolaws.org/legislation/uganda/laws>
59. United Kingdom. 2016 n. 507 - The Tobacco and Related Products Regulations [Internet]. 2016. Disponível em: [https://www.legislation.gov.uk/uksi/2016/507/pdfs/uksi\\_20160507\\_en.pdf](https://www.legislation.gov.uk/uksi/2016/507/pdfs/uksi_20160507_en.pdf)
60. Campaign for Tobacco Free Kids. Legislation by Country/ Jurisdiction - England [Internet]. Tobacco Control Laws. [citado 24 de janeiro de 2024]. Disponível em: <https://www.tobaccocontrolaws.org/legislation/england>
61. United States of America. Family Smoking Prevention And Tobacco Control Act 111 P.L. 31; 123 Stat. 1776; 2009 Enacted H.R. 1256; 111 Enacted H.R. 1256. Jun 22, 2009 [Internet]. Disponível em: <https://www.fda.gov/tobacco-products/rules-regulations-and-guidance/family-smoking-prevention-and-tobacco-control-act-table-contents>
62. Bach L, Campaign for Tobacco-Free Kids. States & Localities with Flavored Tobacco Restrictions [Internet]. 2024 [citado 17 de março de 2022]. Disponível em: <https://www.tobaccofreekids.org/assets/factsheets/0398.pdf>
63. American Nonsmokers' Rights (ANR). Municipalities Prohibiting the Sale of Flavored Tobacco Products [Internet]. 2024. Disponível em: <https://no-smoke.org/wp-content/uploads/pdf/flavored-tobacco-product-sales.pdf>
64. Public Health Law Center. U.S. sales restrictions on flavored tobacco products [Internet]. 2023 [citado 7 de julho de 2022]. Disponível em:

<https://www.publichealthlawcenter.org/sites/default/files/resources/US-sales-restrictions-flavored-tobacco-products.pdf>

65. Campaign for Tobacco Free Kids. Uruguay [Internet]. Tobacco Control Laws. [citado 24 de julho de 2024]. Disponível em: <https://www.tobaccocontrolaws.org/legislation/uruguay/cigarette-contents>
